# Supplementary material for: Growing coral larger and faster: micro-colony-fusion as a strategy for accelerating coral cover
Source: PeerJ journal article supplement (doi:10.7717/peerj.1313), 2015-10-20

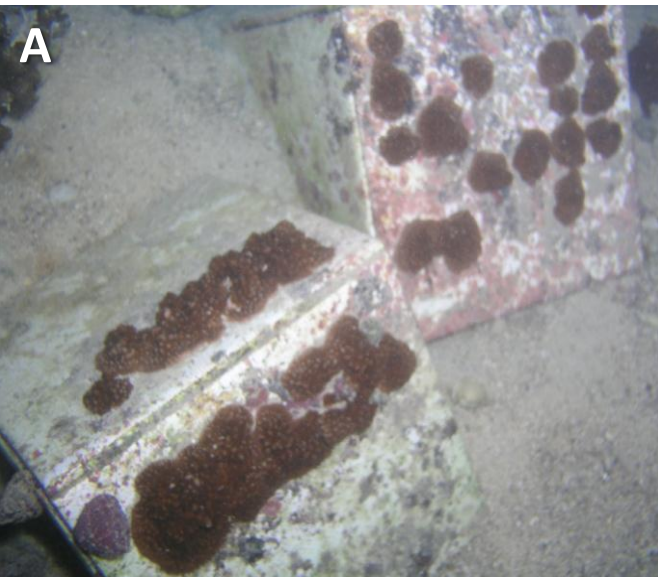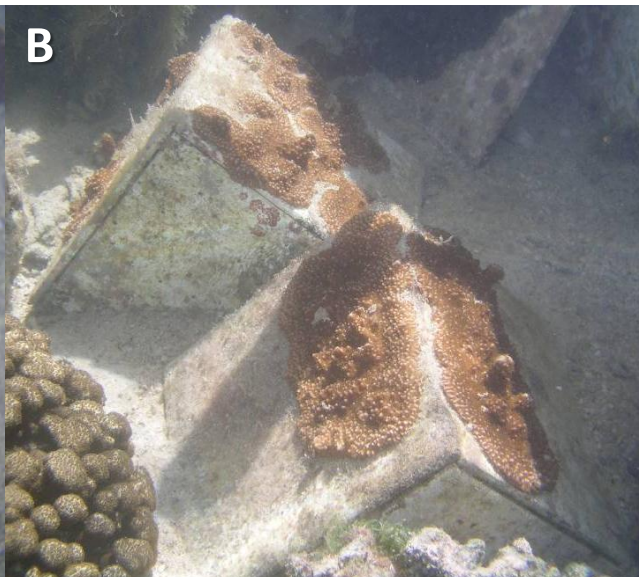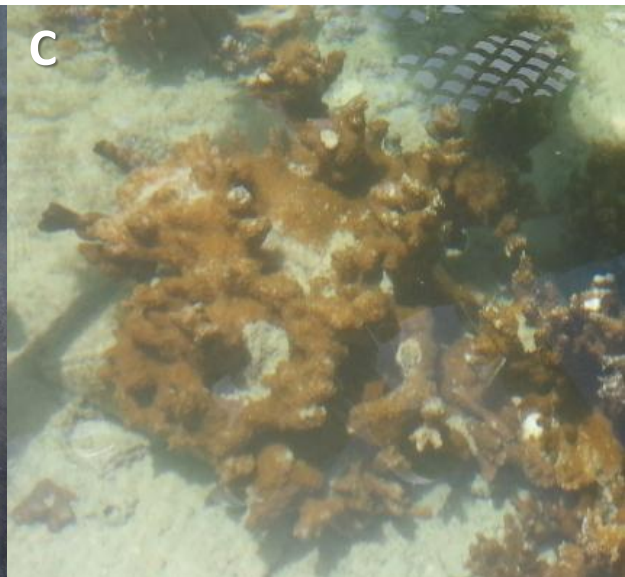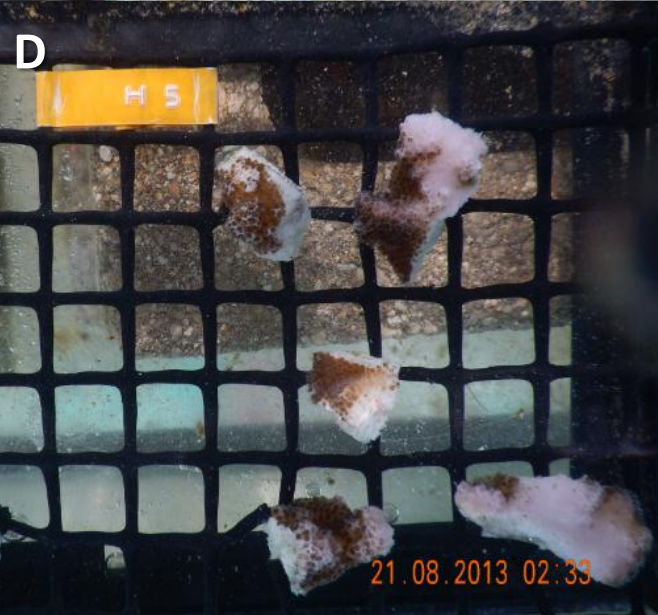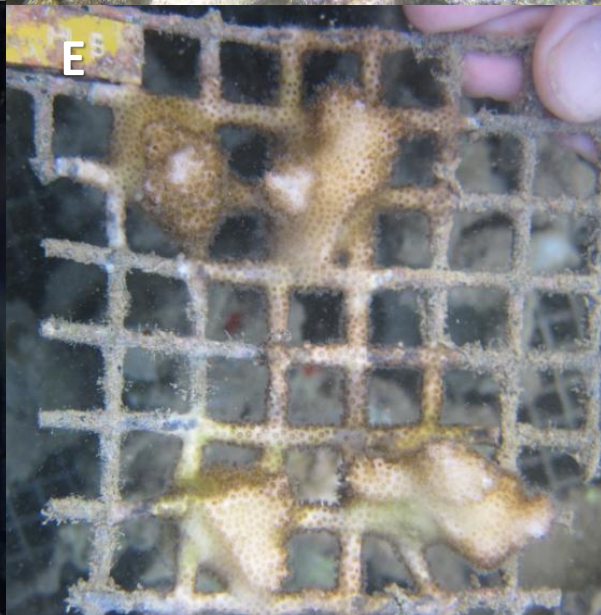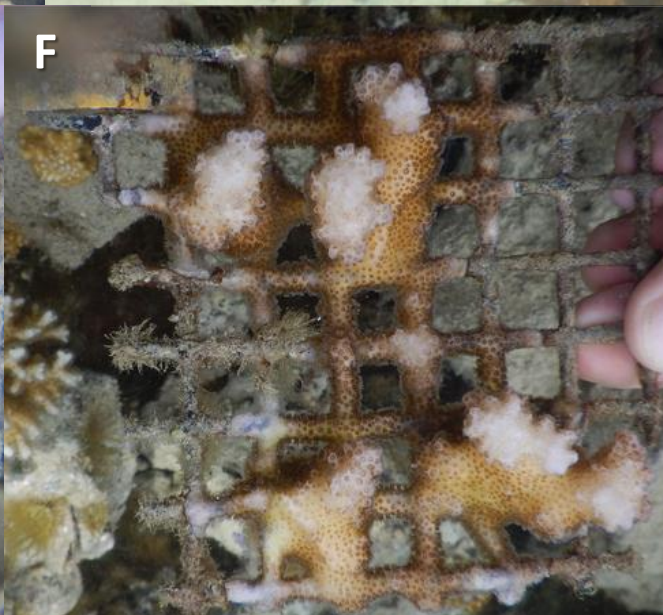

Supplement: Figure_S1.pdf [file Figure_S1.pdf]
