# Supplementary material for: Growing coral larger and faster: micro-colony-fusion as a strategy for accelerating coral cover
Source: PeerJ. 2015 Oct 20;3:e1313. doi: 10.7717/peerj.1313 (PMC4614846; doi:10.7717/peerj.1313)
Supplement: Supplemental Information 1 [file peerj-03-1313-s001.xlsx]

## Sheet: lobata fusion measurements
			2002-06-23	2002-07-31				2003-01-14
nubbin	spacing	tank	Area (cm)	Area (cm)	attached to tile?	net	percent increase
7a1	1	1	0.645	1.539		0.894	1.38605
7a2	1	1	0.185	0.697		0.512	2.76757
7a3	1	1	0.518	1.627		1.109	2.14093
7a4	1	1	1.167	1.477		0.31	0.265638
7a5	1	1	0.292	1.1		0.808	2.76712
7a6	1	1	0.308	1.074		0.766	2.48701
7a7	1	1	0.431	0.908		0.477	1.10673
7a8	1	1	0.674	1.355		0.681	1.01039
7a9	1	1	0.694	1.032		0.338	0.487032
7a10	1	1	0.336	1.054		0.718	2.1369
7a11	1	1	0.322	0.718		0.396	1.22981
7a12	1	1	0.262	0.551		0.289	1.10305
7a13	1	1	0.1
7a14	1	1	0.596	0.968		0.372	0.624161
7a15	1	1	1.103	1.603		0.5	0.453309
7a16	1	1	1.48	1.619		0.139	0.0939189
7a17	1	1	0.67	1.438		0.768	1.14627
7a18	1	1	0.691	1.08		0.389	0.562952
7a19	1	1	0.694	1.278		0.584	0.841499
7a20	1	1	0.696	1.473		0.777	1.11638
7a21	1	1	0.696	1.809		1.113	1.59914
7a22	1	1	0.203	1.513		1.31	6.4532
7a23	1	1	0.804	1.213		0.409	0.508706
7a24	1	1	0.655	0.721		0.066	0.100763
7a25	1	1	0.581	0.335		-0.246	-0.423408
7a26	1	1	1.172	1.059		-0.113	-0.0964164
7a27	1	1	0.59	1.106		0.516	0.874576
7a28	1	1	0.802	1.307		0.505	0.629676
7a29	1	1	0.495	1.041		0.546	1.10303
7a30	1	1	0.62	1.105		0.485	0.782258
7b1	1	1	0.628	0.991		0.363	0.578025
7b2	1	1	0.132	0.689		0.557	4.2197
7b3	1	1	0.064	0.817		0.753	11.7656
7b4	1	1	0.464	1.418		0.954	2.05603
7b5	1	1	0.782	1.164		0.382	0.488491
7b6	1	1	0.277	1.16		0.883	3.18773
7b7	1	1	0.358	1.109		0.751	2.09777
7b8	1	1	0.641	0.917		0.276	0.430577
7b9	1	1	0.976	2.928		1.952	2
7b10	1	1	0.938	1.275		0.337	0.359275
7b11	1	1	0.432	1.392		0.96	2.22222
7b12	1	1	1.079	1.549		0.47	0.435589
7b13	1	1	1.063	1.558		0.495	0.465663
7b14	1	1	0.647	1.37		0.723	1.11747
7b15	1	1	0.757	1.598		0.841	1.11096
7b16	1	1	0.491	0.936		0.445	0.906314
7b17	1	1	0.948	1.508		0.56	0.590717
7b18	1	1	0.323	1.221		0.898	2.78019
7b19	1	1	0.661	1.181		0.52	0.786687
7b20	1	1	0.223	0.965		0.742	3.32735
7b21	1	1	0.463	1.016		0.553	1.19438
7b22	1	1	0.37	0.864		0.494	1.33514
7b23	1	1	0.846	1.25		0.404	0.477541
7b24	1	1	0.923	1.321		0.398	0.431203
7b25	1	1	0.559	1.168		0.609	1.08945
7b26	1	1	0.513	1.121		0.608	1.18519
7b27	1	1	0.294	0.698		0.404	1.37415
7b28	1	1	0.47	0.986		0.516	1.09787
7b29	1	1	0.683	0.921		0.238	0.348463
7b30	1	1	0.938	1.58		0.642	0.684435
8a1	2	1	0.819	1.593		0.774	0.945055
8a2	2	1	0.424	1.731		1.307	3.08255
8a3	2	1	0.558	1.181		0.623	1.11649
8a4	2	1	0.714	1.268		0.554	0.77591
8a5	2	1	1.07	1.847		0.777	0.726168
8a6	2	1	1.183	2.648		1.465	1.23838
8a7	2	1	0.594	0.751		0.157	0.26431
8a8	2	1	0.479	1.898		1.419	2.96242
8a9	2	1	1.096
8a10	2	1	0.67
8a11	2	1	1.198	1.675		0.477	0.398164
8a12	2	1	0.245	1.082		0.837	3.41633
8a13	2	1	0.751	1.063		0.312	0.415446
8a14	2	1	1.49
8a15	2	1	1.073
8a16	2	1	0.256
8a17	2	1	1.115	1.521		0.406	0.364126
8a18	2	1	1.714	2.221		0.507	0.295799
8a19	2	1	1.073
8a20	2	1	0.843
8a21	2	1	0.902	1.868		0.966	1.07095
8a22	2	1	1.166	1.837		0.671	0.575472
8a23	2	1	1.414	0.894		-0.52	-0.367751
8a24	2	1	0.798	1.25		0.452	0.566416
8a25	2	1	0.945
8a26	2	1	0.938
8a27	2	1	0.219	0.489		0.27	1.23288
8a28	2	1	0.665	1.152		0.487	0.732331
8a29	2	1	0.728	1.608		0.88	1.20879
8a30	2	1	0.762	0.784		0.022	0.0288714
8b1	2	1	0.456	0.991		0.535	1.17325
8b2	2	1	0.781	1.295		0.514	0.658131
8b3	2	1	0.963	1.558		0.595	0.617861
8b4	2	1	0.291	0.55		0.259	0.890034
8b5	2	1	1.143	2.353		1.21	1.05862
8b6	2	1	0.848	1.088		0.24	0.283019
8b7	2	1	1.159	1.58		0.421	0.363244
8b8	2	1	0.525	0.923		0.398	0.758095
8b9	2	1	1.594	2.002		0.408	0.25596
8b10	2	1	1.072	1.973		0.901	0.840485
8b11	2	1	0.636	2.204		1.568	2.46541
8b12	2	1	1.436
8b13	2	1	0.577	1.087		0.51	0.883882
8b14	2	1	0.525	1.337		0.812	1.54667
8b15	2	1	1.455	1.973		0.518	0.356014
8b16	2	1	0.799	2.643		1.844	2.30788
8b17	2	1	0.477	0.8		0.323	0.677149
8b18	2	1	0.86	1.365		0.505	0.587209
8b19	2	1	0.614	0.522		-0.092	-0.149837
8b20	2	1	0.621	1.143		0.522	0.84058
8b21	2	1	0.65	2.139		1.489	2.29077
8b22	2	1	0.697	1.342		0.645	0.925395
8b23	2	1	0.41	0.659		0.249	0.607317
8b24	2	1	0.982	1.971		0.989	1.00713
8b25	2	1	0.581	0.973		0.392	0.674699
8b26	2	1	0.867	1.773		0.906	1.04498
8b27	2	1	0.823	1.36		0.537	0.652491
8b28	2	1	0.462	1.185		0.723	1.56494
8b29	2	1	1.028	1.34		0.312	0.303502
8b30	2	1	0.638	0.969		0.331	0.518809
9a1	1	2	0.415	1.253		0.838	2.01928
9a2	1	2	0.357	1.12		0.763	2.13725
9a3	1	2	0.372	1.212		0.84	2.25806
9a4	1	2	0.765	1.73		0.965	1.26144
9a5	1	2	0.214	0.916		0.702	3.28037
9a6	1	2	0.504	1.47		0.966	1.91667
9a7	1	2	0.519	1.347		0.828	1.59538
9a8	1	2	0.828	1.264		0.436	0.52657
9a9	1	2	0.714	1.712		0.998	1.39776
9a10	1	2	0.166	0.719		0.553	3.33133
9a11	1	2	0.538	1.699		1.161	2.15799
9a12	1	2	0.799	1.645		0.846	1.05882
9a13	1	2	0.674	1.888		1.214	1.80119
9a14	1	2	0.473	1.226		0.753	1.59197
9a15	1	2	0.808	1.429		0.621	0.768564
9a16	1	2	0.797	1.687		0.89	1.11669
9a17	1	2	0.289	1.013		0.724	2.50519
9a18	1	2	0.505	1.867		1.362	2.69703
9a19	1	2	0.548	1.471		0.923	1.68431
9a20	1	2	0.817	1.45		0.633	0.774786
9a21	1	2	1.554	1.929		0.375	0.241313
9a22	1	2	0.188	0.917		0.729	3.87766
9a23	1	2	0.556
9a24	1	2	0.385
9a25	1	2	0.947	1.83		0.883	0.932418
9a26	1	2	0.604	1.011		0.407	0.673841
9a27	1	2	1.025	1.724		0.699	0.681951
9a28	1	2	0.668	0.862		0.194	0.290419
9a29	1	2	0.822	1.441		0.619	0.753041
9a30	1	2	0.309	0.756		0.447	1.4466
9b1	1	2	0.644	2.442		1.798	2.79193
9b2	1	2	0.515	1.897		1.382	2.6835
9b3	1	2	1.001	2.766		1.765	1.76324
9b4	1	2	1.213	2.245		1.032	0.850783
9b5	1	2	0.186	0.806		0.62	3.33333
9b6	1	2	0.369	1.934		1.565	4.24119
9b7	1	2	0.523	1.764		1.241	2.37285
9b8	1	2	0.723	1.617		0.894	1.23651
9b9	1	2	0.518	1.599		1.081	2.08687
9b10	1	2	0.545	1.28		0.735	1.34862
9b11	1	2	0.232	1.739		1.507	6.49569
9b12	1	2	0.95	1.868		0.918	0.966316
9b13	1	2	1.087	1.6		0.513	0.471941
9b14	1	2	0.644	1.2		0.556	0.863354
9b15	1	2	1.038	2.019		0.981	0.945087
9b16	1	2	0.311	1.008		0.697	2.24116
9b17	1	2	0.513	1.369		0.856	1.66862
9b18	1	2	0.552	1.159		0.607	1.09964
9b19	1	2	0.581	1.479		0.898	1.54561
9b20	1	2	0.527	1.759		1.232	2.33776
9b21	1	2	0.772	1.316		0.544	0.704663
9b22	1	2	0.489	1.386		0.897	1.83436
9b23	1	2	0.61	1.551		0.941	1.54262
9b24	1	2	0.522	1.514		0.992	1.90038
9b25	1	2	0.57	1.362		0.792	1.38947
9b26	1	2	0.467	1.84		1.373	2.94004
9b27	1	2	0.442	1.098		0.656	1.48416
9b28	1	2	0.24	0.639		0.399	1.6625
9b29	1	2	0.039	0.067		0.028	0.717949
9b30	1	2	0.325	2.094		1.769	5.44308
10a1	2	2	0.611	2.093		1.482	2.42553	7.882
10a2	2	2	0.508	1.892		1.384	2.72441	6.431
10a3	2	2	0.283	1.9		1.617	5.71378	6.889
10a4	2	2	0.844	3.869		3.025	3.58412	5.999
10a5	2	2	0.278	2.354		2.076	7.46763	6.868
10a6	2	2	1.383	3.55		2.167	1.56688	6.4
10a7	2	2	0.685	2.454		1.769	2.58248	8.185
10a8	2	2	0.671	2.521		1.85	2.75708	6.57
10a9	2	2	1.24	2.922		1.682	1.35645	5.964
10a10	2	2	0.744	3.207		2.463	3.31048	6.542
10a11	2	2	0.477	1.637		1.16	2.43187	5.59
10a12	2	2	0.71	2.315		1.605	2.26056	8.506
10a13	2	2	0.727	3.668		2.941	4.04539	6.321
10a14	2	2	0.423	1.601		1.178	2.78487	9.046
10a15	2	2	0.551	2.602		2.051	3.72232	6.255
10a16	2	2	0.813	2.669		1.856	2.2829	9.065
10a17	2	2	0.664	1.281		0.617	0.929217	6.403
10a18	2	2	1.032	2.287		1.255	1.21609	6.124
10a19	2	2	1.339	2.776		1.437	1.07319	12.014
10a20	2	2	0.655
10a21	2	2	1.17	2.768		1.598	1.36581	10.42
10a22	2	2	0.531
10a23	2	2	0.896	2.462		1.566	1.74777
10a24	2	2	0.692	1.509		0.817	1.18064	5.519
10a25	2	2	1.209	3.411		2.202	1.82134	8.694
10a26	2	2	0.805	2.272		1.467	1.82236	5.452
10a27	2	2	1.184	2.336		1.152	0.972973
10a28	2	2	0.813	2.024		1.211	1.48954	6.963
10a29	2	2	0.507	1.181		0.674	1.32939	4.163
10a30	2	2	0.741
10b1	2	2	0.687	2.517		1.83	2.66376
10b2	2	2	0.751
10b3	2	2	0.885	3.132		2.247	2.53898
10b4	2	2	1.38
10b5	2	2	0.106	0.41		0.304	2.86792
10b6	2	2	0.095	0.893		0.798	8.4
10b7	2	2	0.704	1.61		0.906	1.28693
10b8	2	2	1.507
10b9	2	2	0.303	1.479		1.176	3.88119
10b10	2	2	0.487	1.605		1.118	2.29569
10b11	2	2	0.662
10b12	2	2	0.562	2.018		1.456	2.59075
10b13	2	2	0.001
10b14	2	2	0.819	3.098		2.279	2.78266
10b15	2	2	0.982	3.817		2.835	2.88697
10b16	2	2	0.372	2.364		1.992	5.35484
10b17	2	2	0.503	0.899		0.396	0.787276
10b18	2	2	0.673	1.555		0.882	1.31055
10b19	2	2	0.446	1.952		1.506	3.37668
10b20	2	2	0.845	1.776		0.931	1.10178
10b21	2	2	0.895	2.024		1.129	1.26145
10b22	2	2	0.206	1.285		1.079	5.23786
10b23	2	2	0.435	2.197		1.762	4.05057
10b24	2	2	0.748
10b25	2	2	0.922
10b26	2	2	0.797	2.708		1.911	2.39774
10b27	2	2	0.935	2.838		1.903	2.03529
10b28	2	2	0.569	1.708		1.139	2.00176
10b29	2	2	0.643	1.402		0.759	1.1804
10b30	2	2	1.295	2.325		1.03	0.795367

## Sheet: Atlantic coral measurements
			2014-09-02		2014-12-01		2014-12-08		2014-12-15		2014-12-22		2014-12-29		2015-01-05		2015-01-12		2015-01-19
Species	Tile #	frag #	Pixels	cm²	Pixels	cm²	Pixels	cm²	Pixels	cm²	Pixels	cm²	Pixels	cm²	Pixels	cm²	Pixels	cm²	Pixels	cm²
Orbicella faveolata	1A	cube	2708	1	2861	1	2311	1	2399	1	4214	1	4644	1	4499	1	4029	1	4417	1
Orbicella faveolata	1A	a1	1870	0.690547	4890	1.70919	5173	2.23842	7632	3.18133	13915	3.30209	15638	3.36736	15034	3.34163	15206	3.77414	16792	3.80168
Orbicella faveolata	1A	a2	2557	0.944239	6897	2.4107	6517	2.81999	8216	3.42476	15886	3.76981	17262	3.71705	16744	3.72172	17747	4.40482	22165	5.01811
Orbicella faveolata	1A	a3	1710	0.631462	4031	1.40895	3823	1.65426	6560	2.73447	12847	3.04865	14463	3.11434	13104	2.91265	14285	3.54554	13800	3.12429
Orbicella faveolata	1A	a4	2199	0.812038	4964	1.73506	4452	1.92644	7833	3.26511	13743	3.26127	13756	2.9621	12613	2.80351	13404	3.32688	14696	3.32715
Orbicella faveolata	1A	a5	2805	1.03582	6509	2.27508	6040	2.61359	8740	3.64318	15785	3.74585	16877	3.63415	17188	3.8204	17474	4.33706	18649	4.2221
Orbicella faveolata	1A	b1	1582	0.584195	3514	1.22824	4193	1.81437	5714	2.38183	11770	2.79307	12882	2.7739	11661	2.59191	10534	2.61454	13253	3.00045
Orbicella faveolata	1A	b2	2849	1.05207	6865	2.39951	7157	3.09693	9007	3.75448	16661	3.95373	17729	3.81761	17339	3.85397	17141	4.25441	18193	4.11886
Orbicella faveolata	1A	b3	2479	0.915436	5539	1.93604	4949	2.1415	6596	2.74948	13022	3.09018	13849	2.98213	14509	3.22494	15098	3.74733	16753	3.79285
Orbicella faveolata	1A	b4	2487	0.91839	4580	1.60084	4972	2.15145	6325	2.63652	14133	3.35382	14368	3.09388	12979	2.88486	13626	3.38198	15307	3.46547
Orbicella faveolata	1A	b5	2394	0.884047	6634	2.31877	6296	2.72436	7942	3.31055	13856	3.28809	16159	3.47954	15198	3.37808	15082	3.74336	17927	4.05864
Orbicella faveolata	1A	b6	3327	1.22858	7538	2.63474	6398	2.7685	7160	2.98458	15142	3.59326	15487	3.33484	15426	3.42876	15510	3.84959	19287	4.36654
Orbicella faveolata	1A	c1	2287	0.844535	5756	2.01188	5154	2.2302	6341	2.64318	13091	3.10655	13148	2.83118	11629	2.5848	13158	3.26582	15691	3.55241
Orbicella faveolata	1A	c2	2234	0.824963	5551	1.94023	5741	2.48421	6650	2.77199	12220	2.89986	14269	3.07257	12962	2.88108	13867	3.4418	16864	3.81798
Orbicella faveolata	1A	c3	2059	0.76034	4711	1.64663	4479	1.93812	6967	2.90413	13196	3.13147	14074	3.03058	14428	3.20693	13295	3.29983	14614	3.30858
Orbicella faveolata	1A	c4	2163	0.798744	4431	1.54876	4099	1.77369	5372	2.23927	10859	2.57689	12363	2.66214	12557	2.79106	12463	3.09332	14584	3.30179
Orbicella faveolata	1A	c5	2176	0.803545	4529	1.58301	4500	1.94721	5795	2.41559	11665	2.76815	13475	2.90159	12654	2.81263	13615	3.37925	14975	3.39031
Orbicella faveolata	1A	d1	1620	0.598227	5019	1.75428	4494	1.94461	6467	2.69571	13405	3.18106	14290	3.07709	12800	2.84508	15534	3.85555	15338	3.47249
Orbicella faveolata	1A	d2	2266	0.83678	4087	1.42852	4057	1.75552	6894	2.8737	12682	3.00949	14740	3.17399	12855	2.8573	13815	3.42889	15280	3.45936
Orbicella faveolata	1A	d3	2294	0.84712	4280	1.49598	3552	1.537	4838	2.01667	9652	2.29046	7430	1.59991	9625	2.13936	9827	2.43907	11940	2.70319
Orbicella faveolata	1A	d4	2375	0.877031	6586	2.30199	6601	2.85634	7743	3.22759	16632	3.94684	13900	2.99311	16141	3.58769	17746	4.40457	17948	4.06339
Orbicella faveolata	1A	d5	1952	0.720827	4788	1.67354	4575	1.97966	5960	2.48437	11592	2.75083	11944	2.57192	11918	2.64903	12165	3.01936	13359	3.02445
Orbicella faveolata	2A	cube	10268	1	11495	1		1	13333	1		1	12170	1		1	12971	1	12666	1
Orbicella faveolata	2A	a1	10196	0.992988	23215	2.01957			34756	2.60677			35606	2.92572			44289	3.41446	51784	4.08843
Orbicella faveolata	2A	a2	8468	0.824698	21922	1.90709			38225	2.86695			36702	3.01578			44608	3.43906	55684	4.39634
Orbicella faveolata	2A	a3	8679	0.845247	24408	2.12336			36299	2.72249			38288	3.1461			40095	3.09113	48806	3.85331
Orbicella faveolata	2A	a4	11357	1.10606	31270	2.72031			40305	3.02295			41825	3.43673			47563	3.66687	61084	4.82267
Orbicella faveolata	2A	a5	10016	0.975458	22747	1.97886			38781	2.90865			40257	3.30789			42133	3.24825	58664	4.63161
Orbicella faveolata	2A	b1	8301	0.808434	14830	1.29013			29294	2.1971			29945	2.46056			36045	2.77889	46258	3.65214
Orbicella faveolata	2A	b2	9594	0.934359	22978	1.99896			35209	2.64074			40503	3.3281			47514	3.66309	53198	4.20006
Orbicella faveolata	2A	b3	10327	1.00575	19521	1.69822			29691	2.22688			36304	2.98307			39466	3.04263	50716	4.00411
Orbicella faveolata	2A	b4	14180	1.38099	27261	2.37155			43769	3.28276			43555	3.57888			49643	3.82723	56718	4.47797
Orbicella faveolata	2A	b5	11777	1.14696	23825	2.07264			43460	3.25958			46955	3.85826			49473	3.81412	49002	3.86878
Orbicella faveolata	2A	b6	8590	0.83658	20329	1.76851			36518	2.73892			34779	2.85776			40882	3.1518	49634	3.91868
Orbicella faveolata	2A	c1	8644	0.841839	21123	1.83758			34978	2.62342			33090	2.71898			39722	3.06237	45982	3.63035
Orbicella faveolata	2A	c2	11948	1.16362	25950	2.2575			50726	3.80455			50475	4.14749			52604	4.05551	63074	4.97979
Orbicella faveolata	2A	c3	8407	0.818757	19967	1.73702			35062	2.62972			34636	2.84601			42062	3.24277	44725	3.53111
Orbicella faveolata	2A	c4	13161	1.28175	28160	2.44976			51337	3.85037			46900	3.85374			53246	4.105	58084	4.58582
Orbicella faveolata	2A	c5	12019	1.17053	29059	2.52797			45715	3.42871			45918	3.77305			53006	4.0865	61462	4.85252
Orbicella faveolata	2A	c6	15416	1.50136	37157	3.23245			52838	3.96295			55608	4.56927			63815	4.91982	67535	5.33199
Orbicella faveolata	2A	d1	8391	0.817199	14195	1.23488			32874	2.46561			35493	2.91643			40471	3.12011	45737	3.61101
Orbicella faveolata	2A	d2	10478	1.02045	20917	1.81966			43605	3.27046			45171	3.71167			48678	3.75283	53919	4.25699
Orbicella faveolata	2A	d3	11403	1.11054	29672	2.5813			46371	3.47791			46706	3.8378			52364	4.03701	59738	4.71641
Orbicella faveolata	2A	d4	9010	0.877483	24515	2.13267			39361	2.95215			37965	3.11956			43057	3.31948	44808	3.53766
Orbicella faveolata	2A	d5	9601	0.935041	23966	2.08491			32474	2.43561			34972	2.87362			42046	3.24154	48896	3.86041
Orbicella faveolata	2A	d6	9850	0.959291	24795	2.15702			38119	2.859			41776	3.4327			46084	3.55285	49457	3.90471
Orbicella faveolata	3A	cube	10286	1	12526	1		1	13221	1		1	12399	1		1	12661	1	12952	1
Orbicella faveolata	3A	a1	8379	0.814602	17233	1.37578			31424	2.37682			38704	3.12154			44306	3.49941	38407	2.96533
Orbicella faveolata	3A	a2	13047	1.26842	31899	2.54662			46674	3.53029			50065	4.03783			54126	4.27502	71563	5.52525
Orbicella faveolata	3A	a3	11693	1.13679	25355	2.02419			35032	2.64972			40423	3.26018			38499	3.04076	44220	3.41414
Orbicella faveolata	3A	a4	9693	0.942349	30405	2.42735			40070	3.03078			49024	3.95387			47312	3.73683	53746	4.14963
Orbicella faveolata	3A	a5	9105	0.885184	28774	2.29714			36965	2.79593			45118	3.63884			42861	3.38528	53343	4.11851
Orbicella faveolata	3A	b1	7976	0.775423	25084	2.00255			33579	2.53982			33813	2.72707			37821	2.9872	41677	3.2178
Orbicella faveolata	3A	b2	11138	1.08283	22776	1.8183			34082	2.57787			41230	3.32527			41053	3.24248	50173	3.87376
Orbicella faveolata	3A	b3	10769	1.04696	28737	2.29419			36443	2.75645			42469	3.4252			43923	3.46916	51009	3.93831
Orbicella faveolata	3A	b4	8694	0.845227	23540	1.87929			31586	2.38908			38174	3.0788			40456	3.19532	45135	3.48479
Orbicella faveolata	3A	b5	6047	0.587886	27919	2.22888			35388	2.67665			40540	3.26962			42298	3.34081	49671	3.83501
Orbicella faveolata	3A	c1	9389	0.912794	31450	2.51078			40417	3.05703			46185	3.7249			50085	3.95585	55800	4.30821
Orbicella faveolata	3A	c2	7630	0.741785	21351	1.70453			30538	2.30981			32712	2.63828			37440	2.95711	41393	3.19588
Orbicella faveolata	3A	c3	11699	1.13737	25887	2.06666			34883	2.63845			41867	3.37664			43395	3.42745	50456	3.89561
Orbicella faveolata	3A	c4	10628	1.03325	26130	2.08606			35647	2.69624			44142	3.56013			43701	3.45162	48984	3.78196
Orbicella faveolata	3A	c5	8004	0.778145	15858	1.26601			30556	2.31117			30828	2.48633			36540	2.88603	41668	3.21711
Orbicella faveolata	3A	d1	13308	1.2938	34555	2.75866			47594	3.59988			52974	4.27244			59790	4.72238	62833	4.85122
Orbicella faveolata	3A	d2	9916	0.964029	28948	2.31103			40872	3.09145			45590	3.67691			49121	3.87971	49516	3.82304
Orbicella faveolata	3A	d3	11187	1.08759	27367	2.18482			35306	2.67045			45670	3.68336			46658	3.68517	48831	3.77015
Orbicella faveolata	3A	d4	12359	1.20154	33270	2.65608			42300	3.19946			52175	4.208			50585	3.99534	52286	4.03691
Orbicella faveolata	3A	d5	6980	0.678592	26573	2.12143			34884	2.63853			39203	3.16179			44178	3.4893	49435	3.81679
Orbicella faveolata	4A	cube	9839	1	13745	1		1	13161	1		1	11831	1		1	13338	1	12788	1
Orbicella faveolata	4A	a1	6797	0.690822	13627	0.991415			30641	2.32817			34099	2.88217			40187	3.01297	40661	3.17962
Orbicella faveolata	4A	a2	4286	0.435613	9305	0.676973			16677	1.26715			17788	1.50351			21175	1.58757	23587	1.84446
Orbicella faveolata	4A	a3	7377	0.749771	11248	0.818334			30731	2.335			24022	2.03043			36831	2.76136	30705	2.40108
Orbicella faveolata	4A	a4	2726	0.277061	9929	0.722372			21284	1.6172			18993	1.60536			24756	1.85605	24864	1.94432
Orbicella faveolata	4A	a5	9026	0.91737	25454	1.85187			41196	3.13016			42310	3.5762			50355	3.7753	55459	4.3368
Orbicella faveolata	4A	b1	7872	0.800081	13883	1.01004			33142	2.5182			34413	2.90871			39534	2.96401	37213	2.90999
Orbicella faveolata	4A	b2	6968	0.708202	16046	1.16741			42559	3.23372			25968	2.19491			39299	2.94639	44282	3.46278
Orbicella faveolata	4A	b3	6422	0.652709	17597	1.28025			39152	2.97485			28042	2.37021			46449	3.48246	37522	2.93416
Orbicella faveolata	4A	b4	10914	1.10926	26234	1.90862			40701	3.09255			44258	3.74085			45881	3.43987	38736	3.02909
Orbicella faveolata	4A	b5	8316	0.845208	17061	1.24125			40173	3.05243			35991	3.04209			48187	3.61276	51705	4.04324
Orbicella faveolata	4A	c1	4302	0.43724	15684	1.14107			30516	2.31867			30727	2.59716			38289	2.87067	42431	3.31803
Orbicella faveolata	4A	c2	6461	0.656672	20144	1.46555			39734	3.01907			41329	3.49328			44880	3.36482	47786	3.73678
Orbicella faveolata	4A	c3	7442	0.756378	18514	1.34696			40446	3.07317			40427	3.41704			49857	3.73797	46049	3.60095
Orbicella faveolata	4A	c4	6111	0.6211	17137	1.24678			30179	2.29306			28562	2.41417			28455	2.13338	35404	2.76853
Orbicella faveolata	4A	c5	12527	1.2732	21560	1.56857			52069	3.95631			53588	4.52946			61605	4.61876	68180	5.33156
Orbicella faveolata	4A	d1	7225	0.734323	20924	1.5223			42295	3.21366			46835	3.95867			45361	3.40088	52185	4.08078
Orbicella faveolata	4A	d2	8884	0.902937	24570	1.78756			37523	2.85108			38809	3.28028			47468	3.55885	52695	4.12066
Orbicella faveolata	4A	d3	10305	1.04736	20651	1.50244			40003	3.03951			36358	3.07311			41372	3.10181	45281	3.5409
Orbicella faveolata	4A	d4	6893	0.700579	22531	1.63921			53405	4.05782			51756	4.37461			55899	4.19096	63637	4.97631
Orbicella faveolata	4A	d5	7537	0.766033	20820	1.51473			37850	2.87592			43912	3.71161			57680	4.32449	55589	4.34697
Orbicella faveolata	5A	cube	10071	1	12096	1		1	12561	1		1	12580	1		1	13411	1	13080	1
Orbicella faveolata	5A	a1	6091	0.604806	18136	1.49934			24953	1.98655			25790	2.05008			29653	2.2111	33958	2.59618
Orbicella faveolata	5A	a2	5022	0.49866	13992	1.15675			25761	2.05087			31967	2.5411			36262	2.7039	38029	2.90742
Orbicella faveolata	5A	a3	6953	0.690398	12968	1.07209			22247	1.77112			29834	2.37154			37512	2.79711	38750	2.96254
Orbicella faveolata	5A	a4	6621	0.657432	22084	1.82573			23759	1.89149			27760	2.20668			33754	2.51689	35943	2.74794
Orbicella faveolata	5A	a5	8624	0.85632	15634	1.29249			33128	2.63737			43850	3.48569			38489	2.86996	49980	3.8211
Orbicella faveolata	5A	b1	5376	0.53381	13416	1.10913			19870	1.58188			24119	1.91725			24946	1.86011	29453	2.25176
Orbicella faveolata	5A	b2	5255	0.521795	17696	1.46296			23139	1.84213			22265	1.76987			30872	2.30199	39120	2.99083
Orbicella faveolata	5A	b3	8468	0.84083	18430	1.52364			31282	2.49041			36738	2.92035			36661	2.73365	40358	3.08547
Orbicella faveolata	5A	b4	7054	0.700427	18254	1.50909			31731	2.52615			37532	2.98347			37776	2.81679	44172	3.37706
Orbicella faveolata	5A	b5	4916	0.488134	17267	1.4275			29994	2.38787			36212	2.87854			39875	2.97331	42617	3.25818
Orbicella faveolata	5A	c1	5258	0.522093	12858	1.063			18031	1.43547			18146	1.44245			27582	2.05667	27108	2.07248
Orbicella faveolata	5A	c2	5987	0.594479	13619	1.12591			17876	1.42314			24581	1.95397			27862	2.07755	28729	2.19641
Orbicella faveolata	5A	c3	8886	0.882335	23410	1.93535			29087	2.31566			31721	2.52154			41747	3.11289	50506	3.86131
Orbicella faveolata	5A	c4	9727	0.965843	23527	1.94502			35115	2.79556			42770	3.39984			50543	3.76877	55667	4.25589
Orbicella faveolata	5A	c5	9705	0.963658	22607	1.86896			33429	2.66133			42153	3.35079			52398	3.90709	60930	4.65826
Orbicella faveolata	5A	d1	5038	0.500248	14312	1.1832			16966	1.35069			17970	1.42846			27582	2.05667	32679	2.49839
Orbicella faveolata	5A	d2	6592	0.654553	15603	1.28993			23305	1.85535			26202	2.08283			34525	2.57438	34251	2.61858
Orbicella faveolata	5A	d3	6457	0.641148	21469	1.77488			28013	2.23016			26617	2.11582			39367	2.93543	40263	3.07821
Orbicella faveolata	5A	d4	5271	0.523384	20190	1.66915			24620	1.96004			30525	2.42647			34293	2.55708	39242	3.00015
Orbicella faveolata	5A	d5	11114	1.10356	22171	1.83292			42378	3.37378			42076	3.34467			48624	3.62568	48813	3.73188
Total				89.0047		185.575				282.923				319.412				346.061		382.199
average				0.855815		1.78437				2.72042				3.07127				3.32751		3.67499
std dev				0.226545		0.495819				0.583989				0.683382				0.647016		0.7485
95% Cl				0.0435397		0.0952917				0.112237				0.131339				0.12435		0.143854
Day number				1		90				104				111				125		132
Pseudodiploria clivosa	6A	cube	10221	1	12699	1		1	13221	1		1	13081	1		1	13356	1	photo was not taken
Pseudodiploria clivosa	6A	a1	40951	4.00656	63523	5.0022			94745	7.16625			102061	7.80223			142081	10.638
Pseudodiploria clivosa	6A	a2	40744	3.9863	68355	5.38271			96111	7.26957			91771	7.0156			116335	8.71032
Pseudodiploria clivosa	6A	a3	32259	3.15615	64909	5.11135			87464	6.61554			93963	7.18317			115862	8.6749
Pseudodiploria clivosa	6A	b1	33212	3.24939	68121	5.36428			94521	7.14931			107353	8.20679			134986	10.1068
Pseudodiploria clivosa	6A	b2	45162	4.41855	63681	5.01465			105029	7.9441			103363	7.90177			133730	10.0127
Pseudodiploria clivosa	6A	b3	54172	5.30007	87471	6.88802			124885	9.44596			129570	9.90521			161594	12.099
Pseudodiploria clivosa	6A	c1	45797	4.48068	64075	5.04567			110526	8.35988			118408	9.05191			161564	12.0967
Pseudodiploria clivosa	6A	c2	32953	3.22405	64318	5.06481			95799	7.24597			101982	7.79619			127425	9.54066
Pseudodiploria clivosa	6A	c3	32420	3.1719	66847	5.26396			83437	6.31094			81012	6.1931			97792	7.32195
Pseudodiploria clivosa	7A	cube	10798	1	14343	1		1	13027	1		1	14034	1		1	13104	1	13591	1
Pseudodiploria clivosa	7A	a1	37321	3.45629	55141	3.84445			74623	5.72833			113126	8.06085			95130	7.25962	104637	7.69899
Pseudodiploria clivosa	7A	a2	35737	3.30959	61052	4.25657			91059	6.99002			95383	6.79657			93236	7.11508	97424	7.16827
Pseudodiploria clivosa	7A	a3	21317	1.97416	49196	3.42997			62159	4.77155			78446	5.58971			97725	7.45765	87060	6.40571
Pseudodiploria clivosa	7A	b1	35160	3.25616	65393	4.55923			81326	6.24288			85157	6.06791			81910	6.25076	84418	6.21132
Pseudodiploria clivosa	7A	b2	28540	2.64308	57331	3.99714			76663	5.88493			94458	6.73065			93534	7.13782	99016	7.28541
Pseudodiploria clivosa	7A	b3	29967	2.77524	61815	4.30977			96407	7.40055			118534	8.4462			118610	9.05143	127362	9.37105
Pseudodiploria clivosa	7A	c1	36438	3.37451	66262	4.61981			93554	7.18155			111882	7.97221			109900	8.38675	124903	9.19013
Pseudodiploria clivosa	7A	c2	35153	3.25551	58653	4.08931			83370	6.39979			85018	6.058			79178	6.04228	89845	6.61062
Pseudodiploria clivosa	7A	c3	39223	3.63243	92065	6.41881			112941	8.66976			120163	8.56228			117415	8.96024	125705	9.24914
Pseudodiploria clivosa	8A	cube	12053	1	12237	1		1	15638	1		1	12666	1		1	13075	1	13085	1
Pseudodiploria clivosa	8A	a1	56080	4.65278	77094	6.30007			151919	9.71473			157044	12.3989			159256	12.1802	194327	14.8511
Pseudodiploria clivosa	8A	a2	33546	2.78321	61944	5.06203			86068	5.50377			94542	7.46423			90186	6.89759	110756	8.46435
Pseudodiploria clivosa	8A	a3	52840	4.38397	76209	6.22775			115844	7.40785			115704	9.13501			109972	8.41086	126115	9.63814
Pseudodiploria clivosa	8A	b1	32260	2.67651	50797	4.1511			84275	5.38912			105272	8.31138			108254	8.27946	123686	9.4525
Pseudodiploria clivosa	8A	b2	54893	4.5543	84607	6.91403			129234	8.2641			132258	10.442			144393	11.0434	162269	12.4011
Pseudodiploria clivosa	8A	b3	49326	4.09243	63291	5.1721			121487	7.7687			125198	9.88457			132133	10.1058	138265	10.5667
Pseudodiploria clivosa	8A	c1	62150	5.15639	82899	6.77445			148885	9.52072			156325	12.3421			169952	12.9982	194885	14.8938
Pseudodiploria clivosa	8A	c2	37418	3.10446	75609	6.17872			94481	6.04176			97671	7.71127			97112	7.4273	107016	8.17853
Pseudodiploria clivosa	8A	c3	48637	4.03526	83355	6.81172			129668	8.29185			130615	10.3123			152859	11.6909	156240	11.9404
Pseudodiploria clivosa	9A	cube	11333	1	12131	1		1	12737	1		1	14013	1		1	14245	1	13981	1
Pseudodiploria clivosa	9A	a1	21544	1.901	35798	2.95095			56845	4.46298			74848	5.34133			58726	4.12257	50172	3.58858
Pseudodiploria clivosa	9A	a2	16259	1.43466	47509	3.91633			53256	4.1812			61675	4.40127			64837	4.55156	48297	3.45447
Pseudodiploria clivosa	9A	a3	16261	1.43484	27654	2.27961			47655	3.74146			55555	3.96453			52908	3.71415	68083	4.86968
Pseudodiploria clivosa	9A	b1	23641	2.08603	41155	3.39255			59538	4.67441			84346	6.01913			59508	4.17747	48531	3.47121
Pseudodiploria clivosa	9A	b2	30471	2.6887	45745	3.77092			58185	4.56819			90099	6.42967			87055	6.11127	92019	6.58172
Pseudodiploria clivosa	9A	b3	21452	1.89288	39464	3.25315			56653	4.44791			72284	5.15835			69000	4.8438	77875	5.57006
Pseudodiploria clivosa	9A	c1	21238	1.874	24815	2.04559			44667	3.50687			52253	3.72889			60416	4.24121	65386	4.67678
Pseudodiploria clivosa	9A	c2	18343	1.61855	30719	2.53227			60084	4.71728			57563	4.10783			70472	4.94714	74366	5.31908
Pseudodiploria clivosa	9A	c3	23115	2.03962	43899	3.61875			86748	6.81071			93229	6.65304			92202	6.47259	95930	6.86145
Pseudodiploria clivosa	10A	cube	10591	1	12056	1		1	13555	1		1	12364	1		1	12313	1	13090	1
Pseudodiploria clivosa	10A	a1	26069	2.46143	47655	3.9528			42189	3.11243			61324	4.95988			82545	6.70389	100810	7.7013
Pseudodiploria clivosa	10A	a2	25862	2.44188	45450	3.76991			56697	4.18274			55507	4.4894			79020	0.957296	88791	6.78312
Pseudodiploria clivosa	10A	a3	32236	3.04372	43938	3.64449			51181	3.7758			55460	4.4856			72624	0.919058	75008	5.73018
Pseudodiploria clivosa	10A	b1	23472	2.21622	49244	4.08461			48984	3.61372			63159	5.1083			83643	1.15173	88500	6.76089
Pseudodiploria clivosa	10A	b2	27741	2.6193	46964	3.89549			63968	4.71914			52373	4.23593			91199	1.09034	94062	7.18579
Pseudodiploria clivosa	10A	b3	25159	2.37551	46344	3.84406			48976	3.61313			54133	4.37828			67686	0.742179	78104	5.96669
Pseudodiploria clivosa	10A	c1	21720	2.0508	35042	2.9066			51229	3.77934			55166	4.46182			79703	1.17754	82018	6.2657
Pseudodiploria clivosa	10A	c2	19009	1.79483	28088	2.32979			28099	2.07296			35278	2.85328			55129	0.69168	53551	4.09099
Pseudodiploria clivosa	10A	c3	19689	1.85903	43828	3.63537			65014	4.79631			58056	4.69557			77102	1.39857	62380	4.76547
Total				135.943		201.078				269.456				308.814				303.91		269.22
average				3.04736		4.48733				6.015				6.91178				6.87527		7.47834
std dev				1.01965		1.29271				1.90722				2.27999				3.55927		2.85203
95% CI				0.297915		0.377697				0.557242				0.666155				1.03993		0.931645
Day number				1		90				104				111				125		132
